# Supplementary material for: New nonflammable tributyl phosphate based localized high concentration electrolytes for lithium metal batteries
Source: Royal Society of Chemistry journal article supplement (doi:10.1039/d2se00231k), 2022-01-01
Supplement: d2se00231k1.pdf [file d2se00231k1.pdf]

## Supporting information

### **New nonflammable tributyl phosphate based localized high concentration electrolytes for lithium metal batteries**

Xuanjie Feng<sup>1,2</sup>, Zhen Zhang<sup>1,2</sup>, Rui Li<sup>3</sup>, Weihan Xiong<sup>1,2</sup>, Bo Yu<sup>1,2,\*</sup>, Mingshan Wang<sup>1,2,\*</sup>, Junchen Chen<sup>1,2</sup>, Zhiyuan Ma<sup>1,2</sup>, Bingshu Guo<sup>1,2</sup>, Yun Huang<sup>1,2</sup>, Xing Li<sup>1,2,\*</sup>

1 School of New Energy and Materials, Southwest Petroleum University, Chengdu, Sichuan 610500, P.R. China

2 Energy Storage Research Institute, Southwest Petroleum University, Chengdu, Sichuan 610500, P.R. China

3 Key Laboratory of Military Special Power Supply, Army Engineering University of PLA, Chongqing 400035, China

**Corresponding Authors:** \*(X.L) Tel: +86 28 83037409. Fax: +86 28 83037409.

\* E-mails: yb@swpu.edu.com (B. Y.), ustbwangmingshan@163.com (M.-S. Wang),

lixing198141@swpu.edu.com (X. Li)

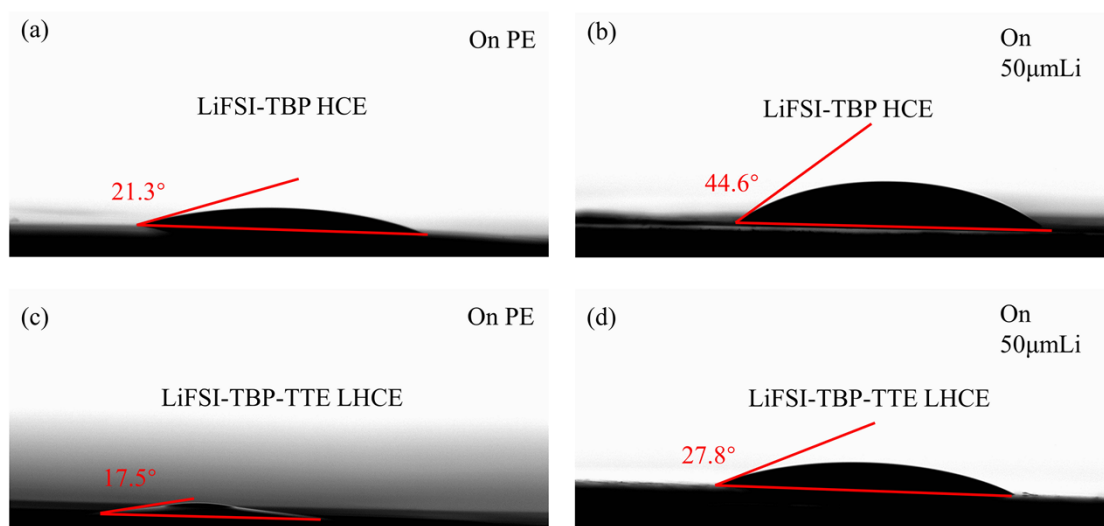

**Fig. S1** Contact angle of different electrolytes on PE and 50  $\mu\text{m}$  Li anode.

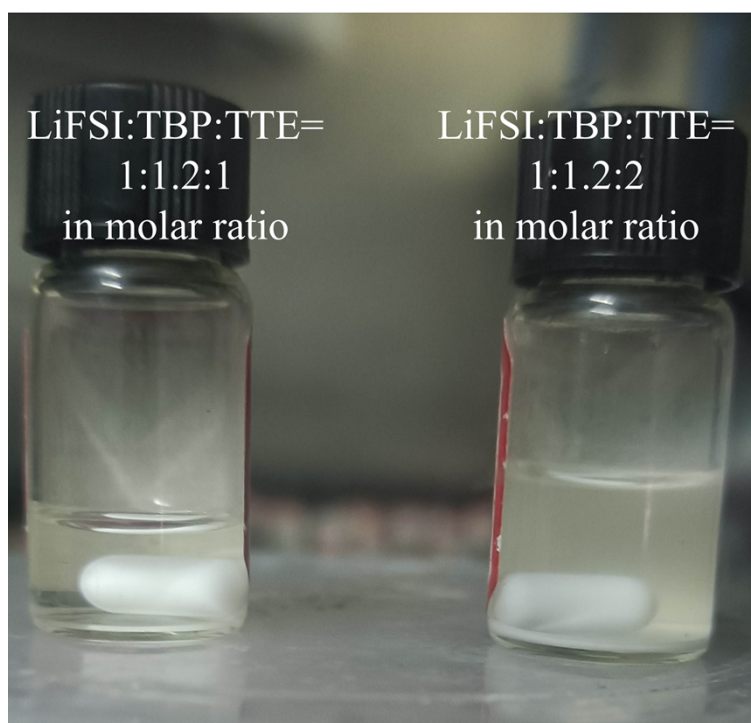

**Fig. S2** Photographs of LiFSI-TBP HCE within different amounts of TTE.

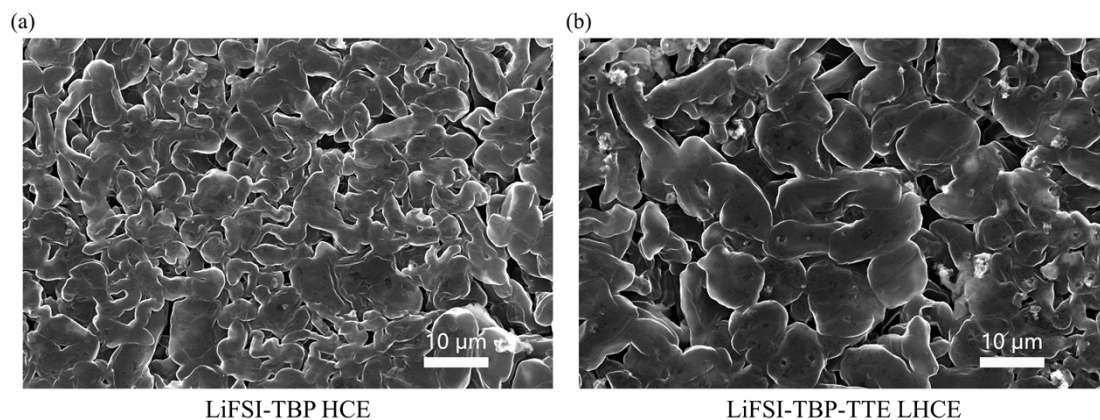

**Fig. S3** SEM images of deposition morphologies in LiFSI-TBP HCE (a) and LiFSI-TBP-TTE LHCE (b).

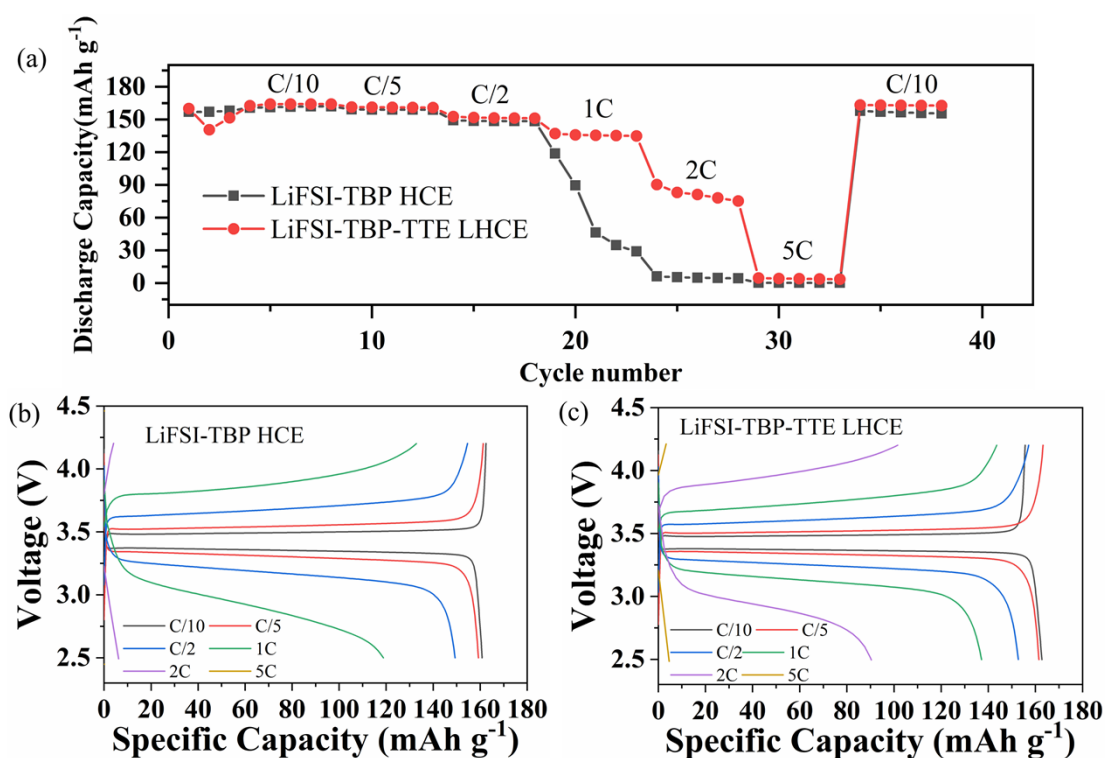

**Fig. S4** (a) Rate capability of Li||LFP using the LiFSI-TBP HCE and LiFSI-TBP-TTE LHCE. (b) Voltage profiles of using LiFSI-TBP HCE. (c) Voltage profiles of using LiFSI-TBP-TTE LHCE.

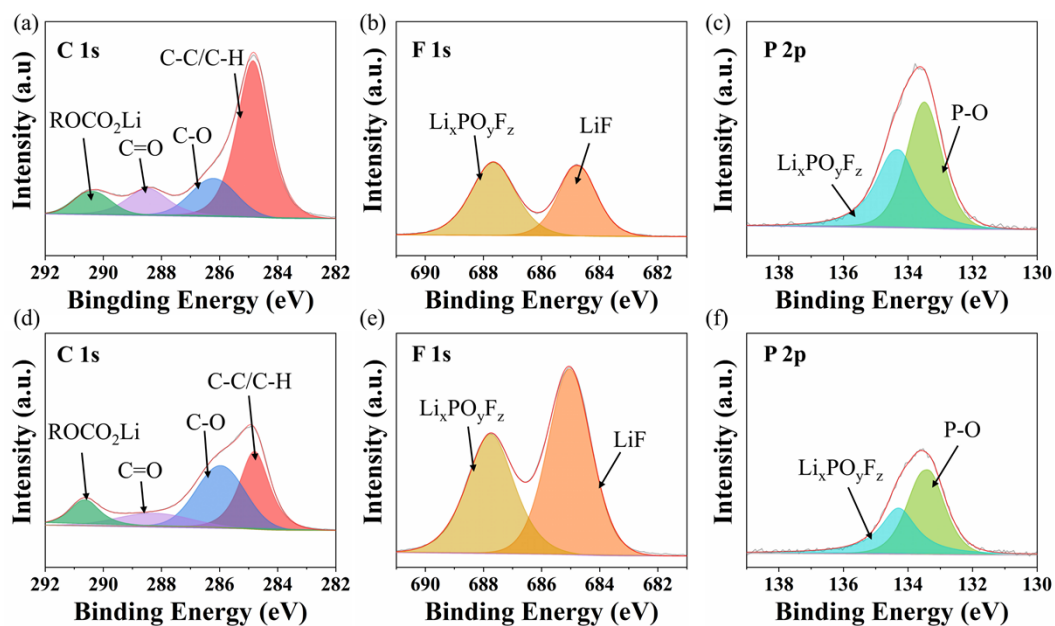

**Fig. S5** XPS characterization of LFP cathode after 200 cycles in LiFSI-TBP HCE **(a-c)** and LiFSI-TBP-TTE LHCE **(d-f)**.
